# Supplementary material for: Enhancement of electrical conductivity, dielectric anisotropy and director relaxation frequency in composites of gold nanoparticle and a weakly polar nematic liquid crystal
Source: Royal Society of Chemistry journal article supplement (doi:10.1039/c3ra45761c), 2013-10-30
Supplement: c3ra45761c.pdf [file c3ra45761c.pdf]

## Supporting Information

### <sup>1</sup>H NMR

<sup>1</sup>H NMR spectrum of the GNP (**1**), prepared by modified Brust protocol, has been recorded using Bruker-AMX 400 instrument and analyzed. As shown in Figure SI-1, the spectral pattern suggests the stabilization of gold colloids by ligand, dodecane-1-thiol (**2**). Most importantly, in <sup>1</sup>H NMR spectrum of the GNP (**1**) the signals due to ligands are almost negligible. That is, the quartet arising due to methylene moiety [ -CH<sub>2</sub>-SH ] of ligand (see circled area in Figure SI-1 and compare with same region in Figure SI-2) is quite minute implying that the GNP is mostly free from un-bound ligands.

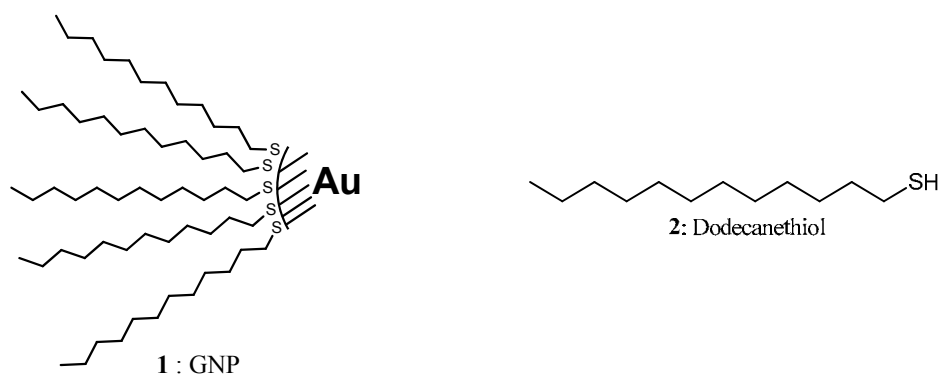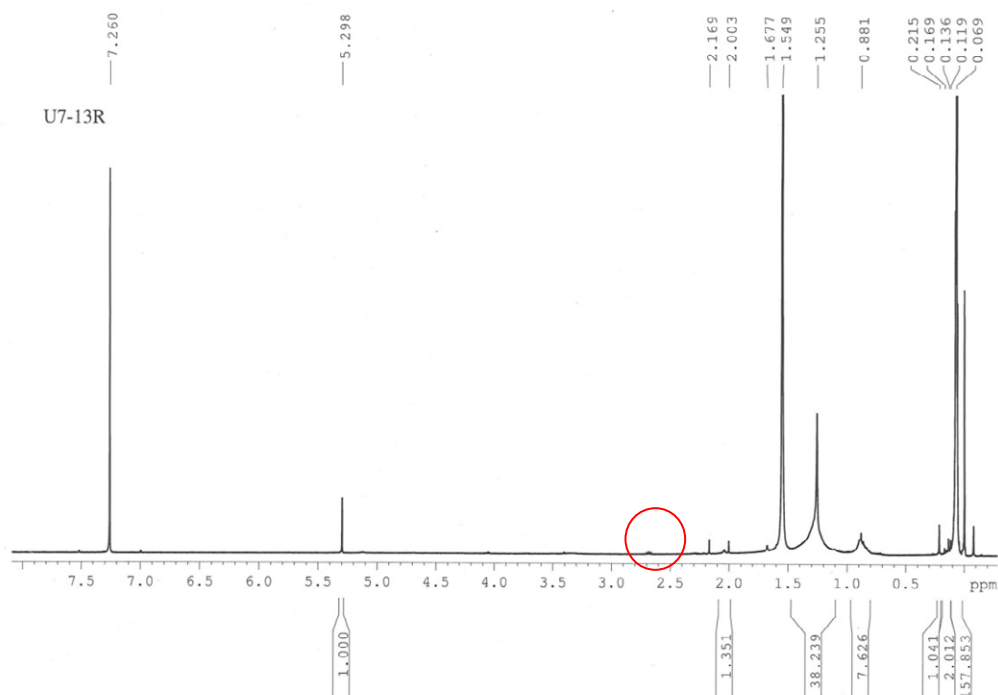

Figure SI-1 :  $^1\text{H}$  NMR spectrum of GNP ( $\text{CDCl}_3$ , 400 MHz)

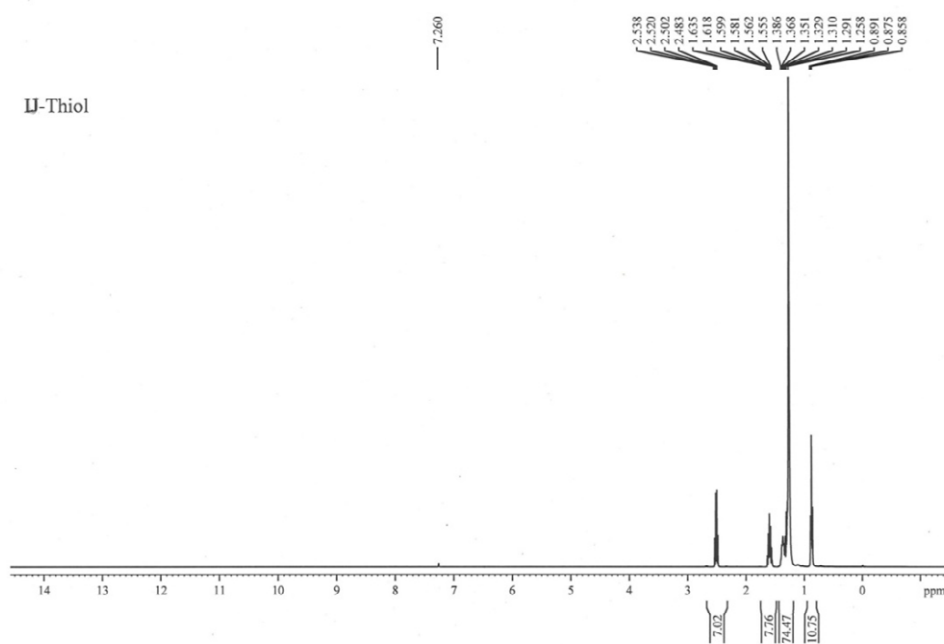

Figure SI-2:  $^1\text{H}$  NMR spectrum of dodecane-1-thiol ( $\text{CDCl}_3$ , 400 MHz)

### Transmission Electron Microscopy

TEM images were obtained on a JEOL 3010 TEM scanning/transmission electron microscope operating at 300 kV. Samples were prepared by casting a droplet of functionalized GNPs in DCM solvent onto carbon-coated copper TEM grids followed by drying for 20 min. A representative image, and the histogram of the particle size distribution are shown below.

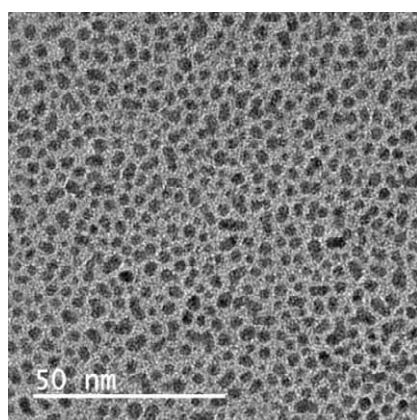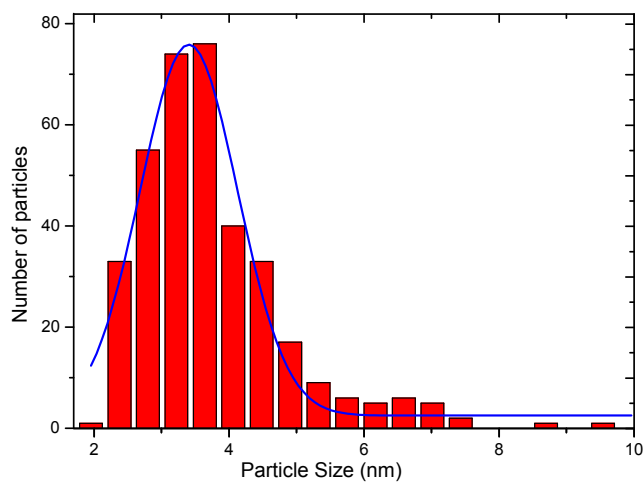

Figure SI-3: TEM image (left) and histogram (right)

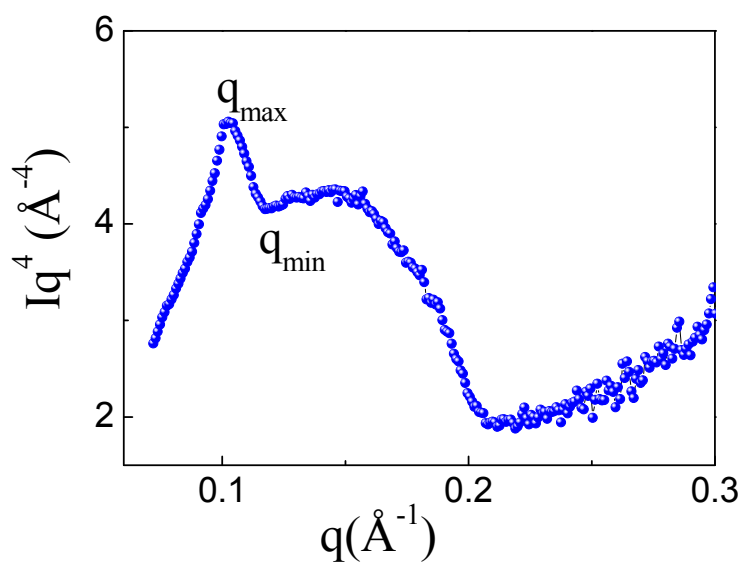

Figure SI-4: Porod plot from low angle Xray scattering of the gold nanoparticles prepared.

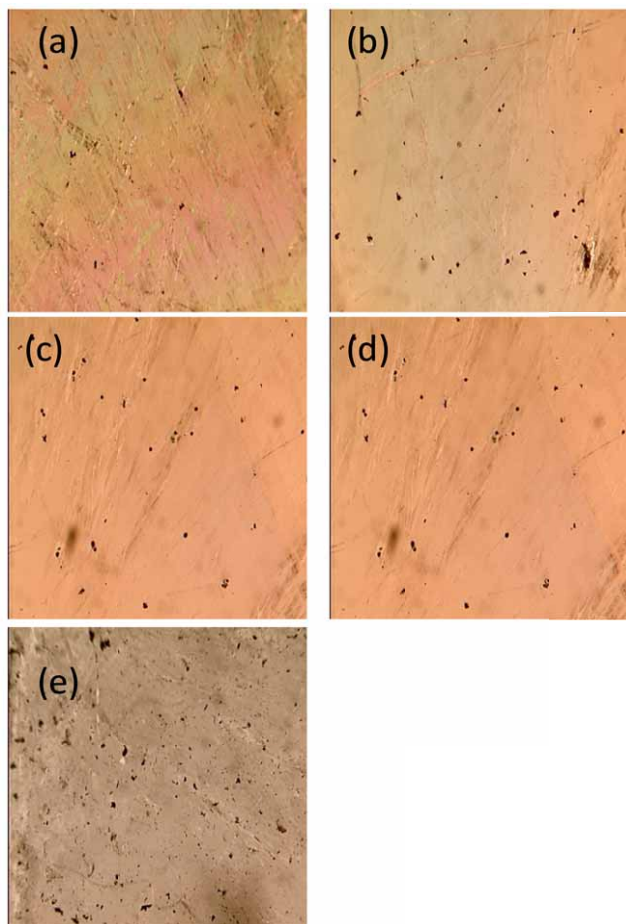

Figure SI-5: Polarizing microscopy photographs in the nematic phase for different concentrations of GNP with  $X=$  (a) 0.005, (b) 0.01, (c) 0.02, (d) 0.025 and (e) 0.05. In each case it is observed that the GNPs are quite well dispersed without any aggregation.
